# Supplementary material for: Green Synthesis of Three-Dimensional Hybrid N-Doped ORR Electro-Catalysts Derived from Apricot Sap
Source: MDPI journal article supplement (doi:10.3390/ma11020205), 2018-01-28
Supplement: s1 [file s1]

## Supplementary Information

# Green Synthesis of Three-Dimensional Hybrid N-Doped ORR Electro-Catalysts Derived from Apricot Sap

Ramesh Karunakaran <sup>1</sup>, Campbell Coghlan <sup>2</sup>, Cameron Shearer <sup>3</sup>, Diana Tran <sup>1</sup>, Karan Gulati <sup>1</sup>, Tran Thanh Tung <sup>1</sup>, Christian Doonan <sup>2</sup> and Dusan Losic <sup>1,\*</sup>

<sup>1</sup> School of Chemical Engineering, University of Adelaide, SA 5005, Australia; ramesh.karunakaran@adelaide.edu.au (R.K.); diana.tran@adelaide.edu.au (D.T.); k.gulati@griffith.edu.au (K.G.); tran.tung@adelaide.edu.au (T.T.T.)

<sup>2</sup> School of Chemistry, University of Adelaide, SA 5005, Australia; cam.coghlan@adelaide.edu.au (C.C.); christian.doonan@adelaide.edu.au (C.D.)

<sup>3</sup> School of Chemical and Physical Sciences, Flinders University, SA 5042, Australia; cameron.shearer@flinders.edu.au

\* Correspondence: dusan.losic@adelaide.edu.au; Tel.: +61-8-8013-4648

Received: 10 January 2018; Accepted: 26 January 2018; Published: 28 January 2018

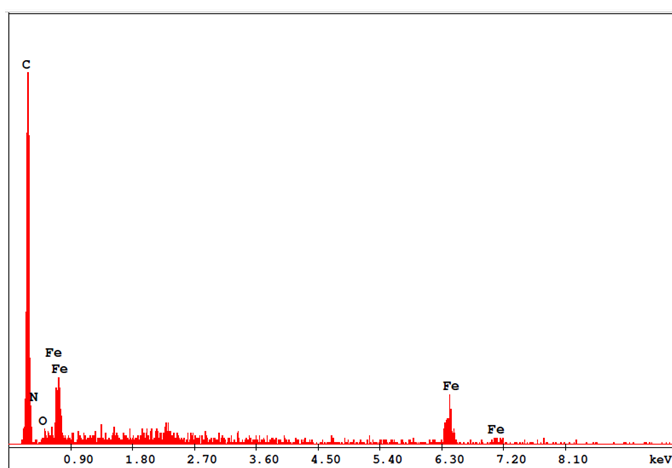

Figure S1. EDX analysis of FeMNP embedded in the CMS.

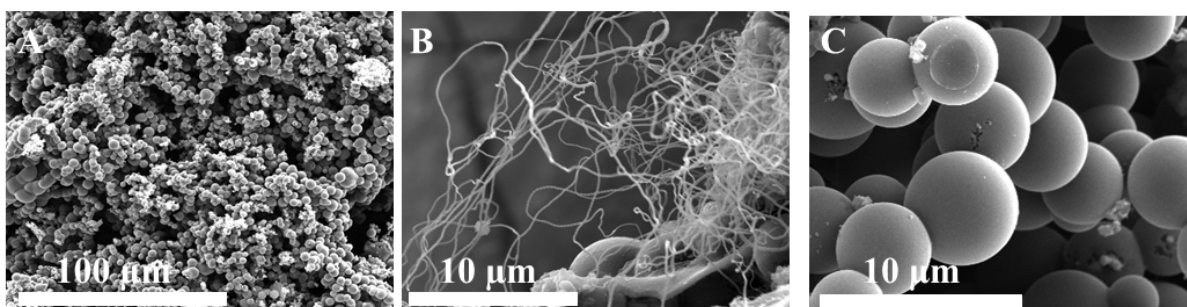

**Figure S2.** SEM images of (A) hydrothermally treated apricot sap resin and cobalt acetate (HT-APG-Co), (B) pyrolysed HT-APG-Co at 950°C with the presence of nitrogen precursor melamine (N-APG-Co), and (C) pyrolysed HT-APG-Co at 950°C without melamine (APG-Co)

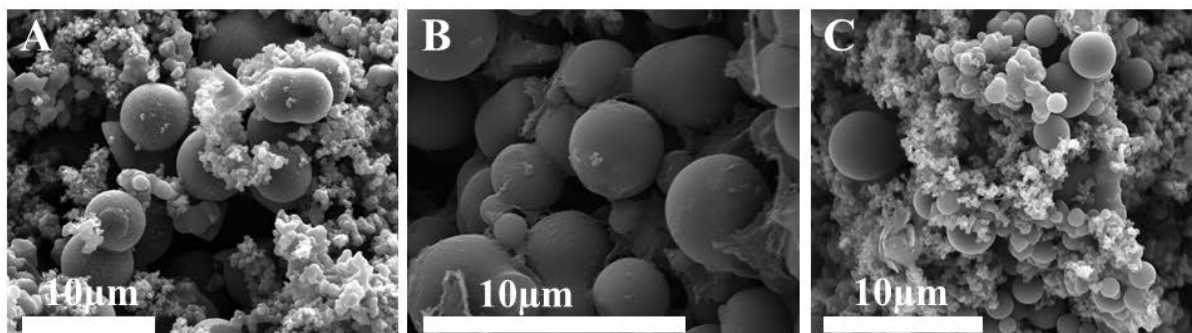

**Figure S3.** SEM images of (A) hydrothermally treated apricot sap resin (HT-APG), (B) pyrolysed HT-APG at 950°C with the presence of nitrogen precursor melamine (N-APG), and (C) pyrolysed HT-APG at 950°C without melamine (APG)

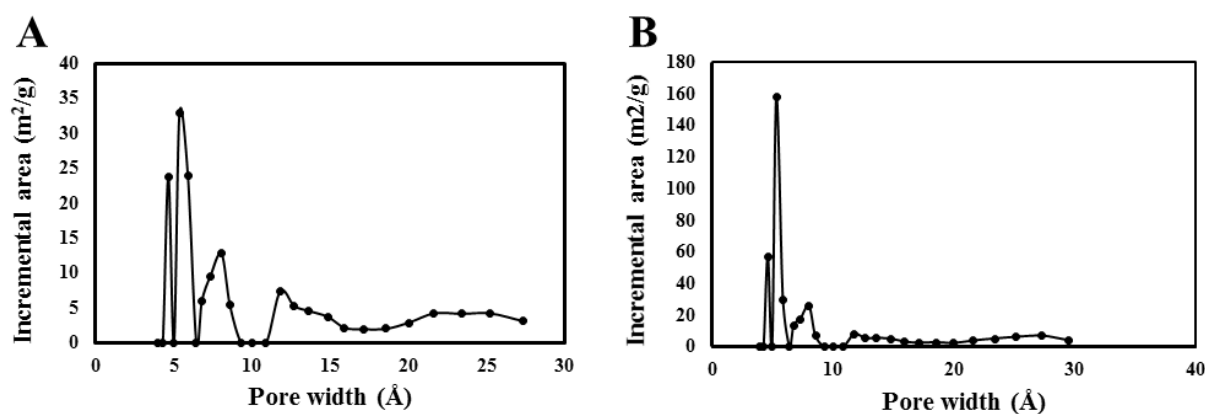

**Figure S4.** Pore size distribution of (A) APG-Fe and (B) APG-Co.

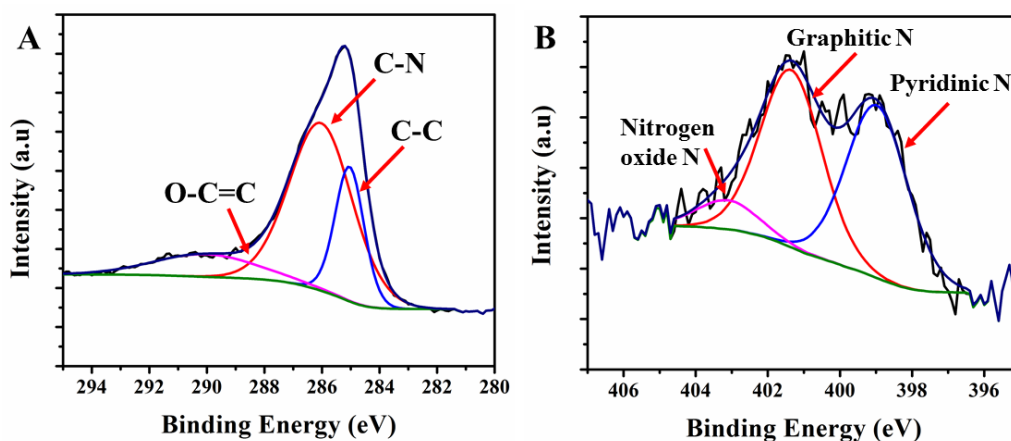

**Figure S5.** XPS core level spectra of N-APG-Fe for (A) C1s and (B) N1s.

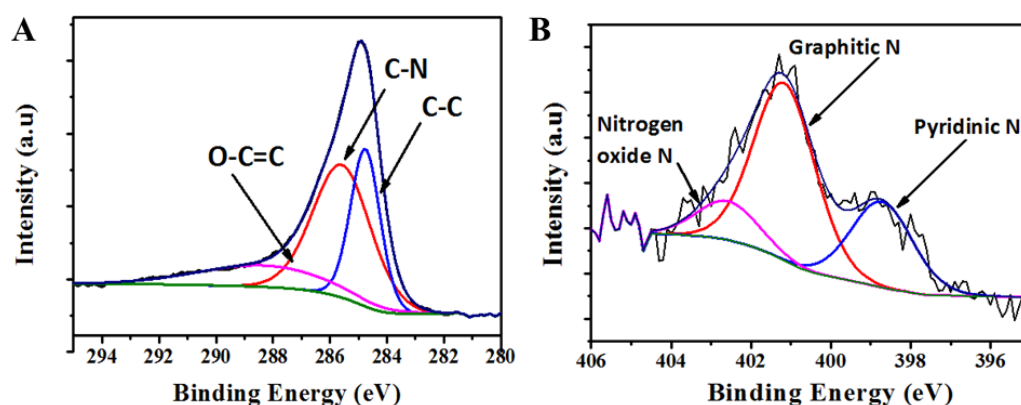

**Figure S6.** XPS core level spectra of N-APG-Co for (A) C1s and (B) N1s.

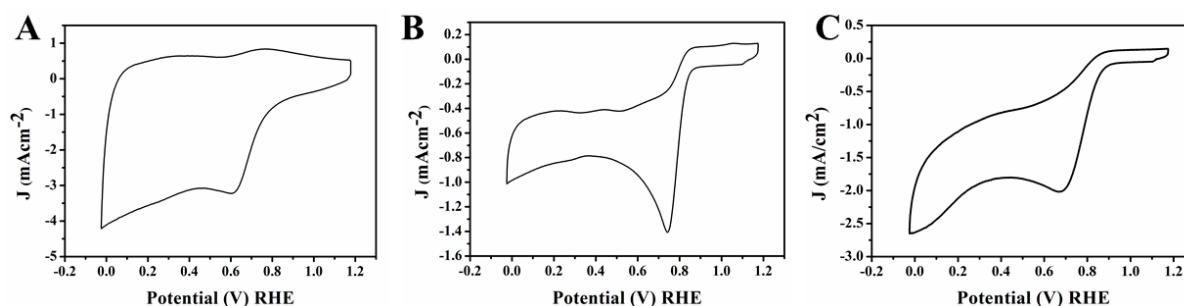

**Figure S7.** Cyclic Voltammetry of (A) N-APG, (B) N-APG-Fe and (C) N-APG-Co at a scan rate of 100 mV/s-1 in oxygen saturated 0.1M KOH solution.

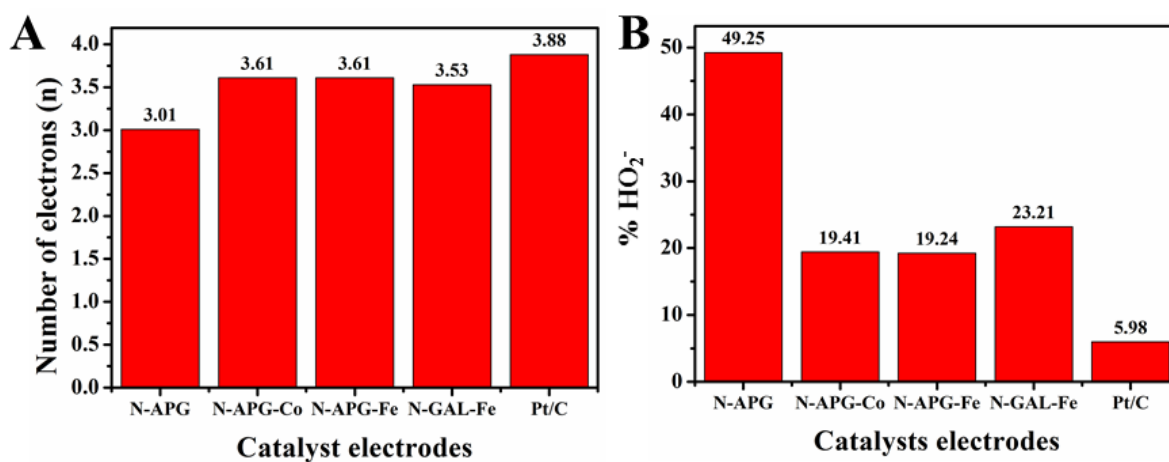

**Figure S8.** (A) Comparison of number of electrons and (B) %  $\text{HO}_2^-$  of N-APG, N-APG-Co, N-APG-Fe, N-GAL-Fe and Pt/C catalysts electrodes at 0.4V applied potential in oxygen saturated 0.10 M KOH electrolyte at 2000 rpm at a scan rate of 10 mV/s.

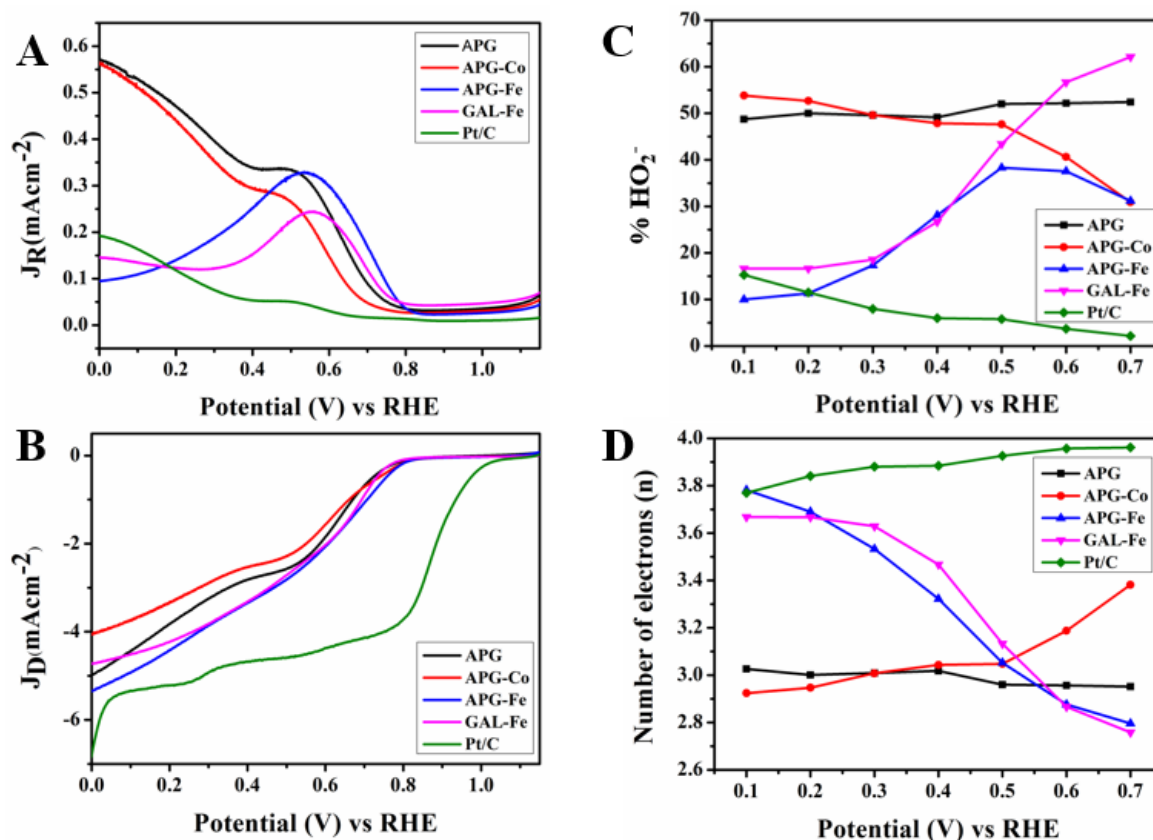

**Figure S9.** Rotating ring disc voltammograms of (A) ring current and (B) disc current of catalysts electrodes APG, APG-Co, APG-Fe, GAL-Fe and Pt/C, pyrolysed without the presence of melamine in oxygen saturated 0.1M KOH at 2000 rpm at a scan rate of 10mV/s. (C) Percentage peroxide, and (D) number of electrons of APG, APG-Fe, APG-Co and Pt/C electrodes at various potential calculated according to RRDE data.

**Table S1.** Electro chemical properties of non-doped apricot sap and galactose catalysts.

| Product | Current density (mA/cm <sup>2</sup> ) at 0V | Onset potential (V) (RHE) | Number of electrons (n) (0.1-0.7 V) | % $\text{HO}_2^-$ (0.1-0.7V) |
|---------|---------------------------------------------|---------------------------|-------------------------------------|------------------------------|
| APG     | 4.98                                        | 0.78                      | 3.02-2.95                           | 48.70-52.41                  |
| APG-Fe  | 5.33                                        | 0.80                      | 3.78-2.79                           | 10.90-60.21                  |
| APG-Co  | 4.05                                        | 0.80                      | 2.92-3.38                           | 53.81-30.91                  |
| GAL-Fe  | 4.72                                        | 0.82                      | 3.66-2.75                           | 16.60-62.10                  |

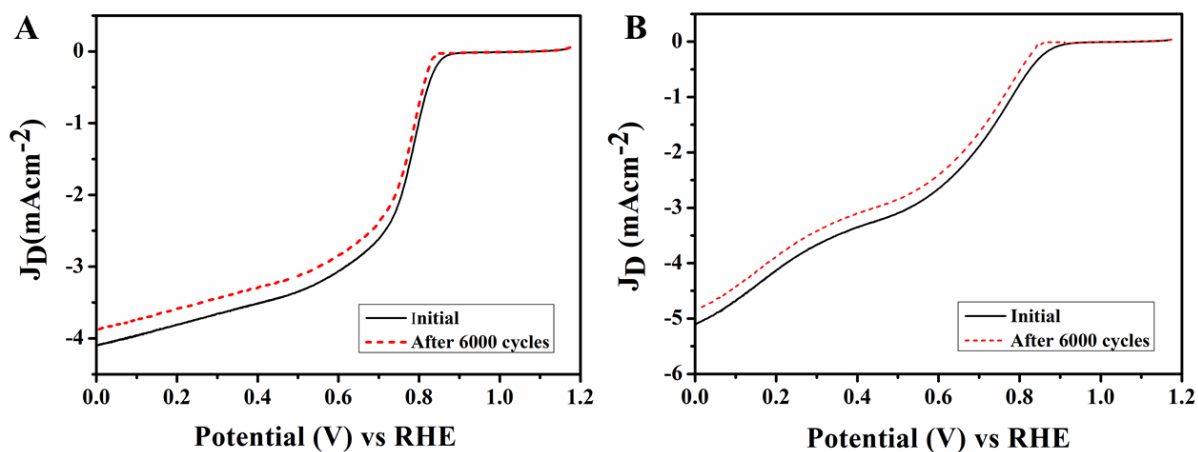

Figure S10. RDE polarisation curves of (A) N-APG-Co and (B) N-APG-Fe with a scan rate of 100 mV s<sup>-1</sup> before and after 6000 potential cycles in an oxygen saturated KOH solution.

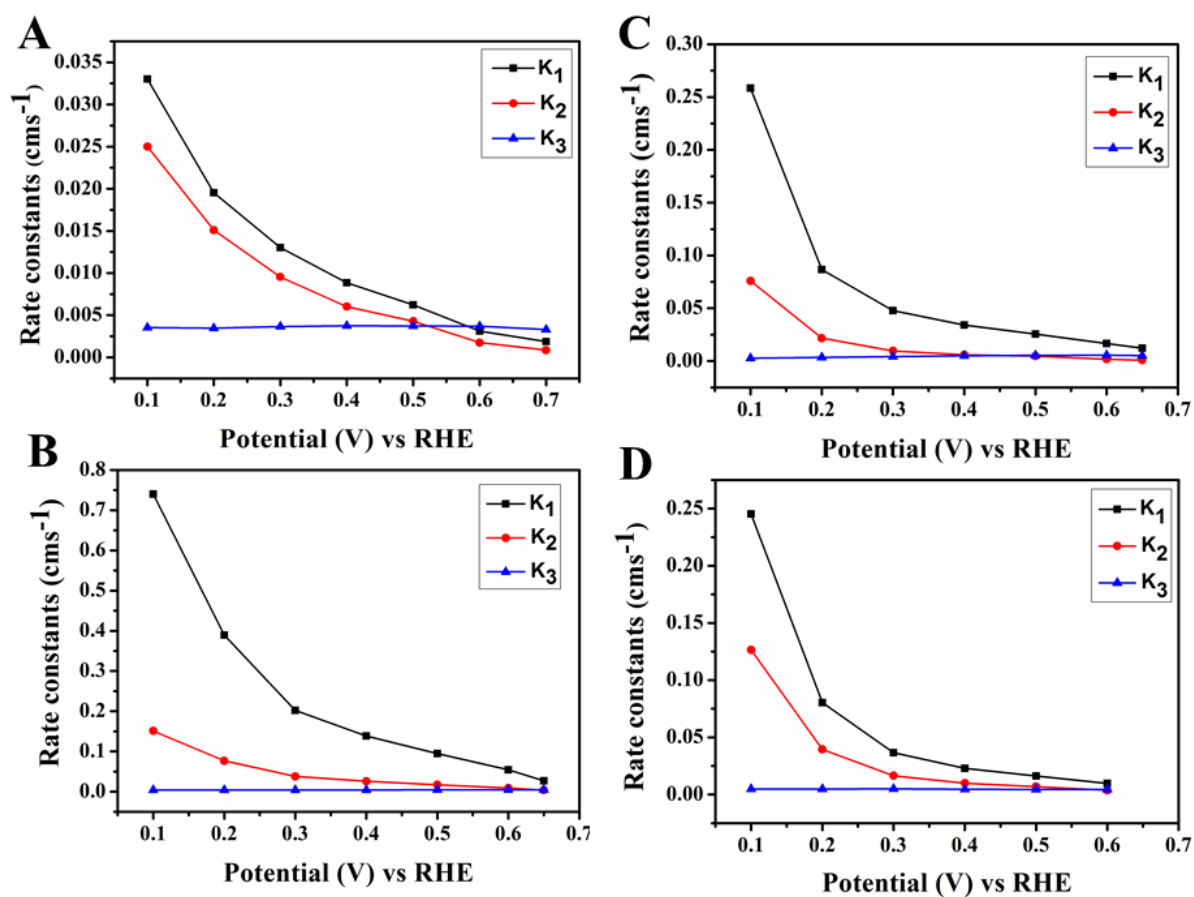

Figure S11. Rate constants of (A) N-APG, (B) N-APG-Co, (C) N-APG-Fe, and (D) N-GAL-Fe.

**Table S2.** comparison of  $k_1/k_2$  of N-doped apricot and galactose catalysts

|          | $k_1/k_2$            |                       |
|----------|----------------------|-----------------------|
|          | Potential 0.1V (RHE) | Potential 0.65V (RHE) |
| N-APG    | 1.32                 | 2.18                  |
| N-APG-Co | 4.90                 | 6.97                  |
| N-APG-Fe | 3.40                 | 14.14                 |
| N-GAL-Fe | 4.30                 | 6.40                  |

**Table S3.** comparison of performance of N-APG-Fe, N-APG-Co and N-GAL-Fe with other similar carbon-based catalysts.

| Material                                                  | Onset potential (V) | Number of electrons (n) / Potential (V) (RHE) | Reference         |
|-----------------------------------------------------------|---------------------|-----------------------------------------------|-------------------|
| Soya -derived heteroatom doped carbon                     | 0.96                | 3.70 / 0.625 V                                | [1]               |
| N-doped mesoporous carbon spheres                         | 0.86                | 3.40 / 0.575 V                                | [2]               |
| N-doped hollow carbon spheres                             | 0.80                | 3.82 / 0.575 V                                | [3]               |
| Co-N-C hybrid using soya milk                             | 0.80                | 3.70 / 0.675 V                                | [4]               |
| 3D-Integrated N-doped carbon sphere with N-CNT (N-GAL-Fe) | 0.96                | 3.55 / 0.600 V                                | [8]               |
| 3D-Integrated N-doped carbon sphere with N-CF (N-APG-Co)  | 0.86                | 3.63 / 0.600 V                                | <b>This study</b> |
| 3D-Integrated N-doped carbon sphere with N-CF (N-APG-Fe)  | 0.88                | 3.73 / 0.600 V                                | <b>This study</b> |

## Electron transfer kinetics

The electron transfer kinetic of the ORR was identified using RRDE voltametry (Scheme S1) [5, 6]. According to Damjanovic *et al.* [5] the electron transfer mechanism follows a direct four-electron pathway via  $k_1$  kinetics (Scheme S1), in which oxygen is directly reduced to hydroxide anion ( $\text{OH}^-$ ) or could be driven through a two-electron pathway via  $k_2$  kinetics producing peroxide intermediates ( $\text{HO}_2^-$ ), followed by reduction to hydroxide anion ( $\text{OH}^-$ ) through another two electron pathway through  $k_3$  kinetics.

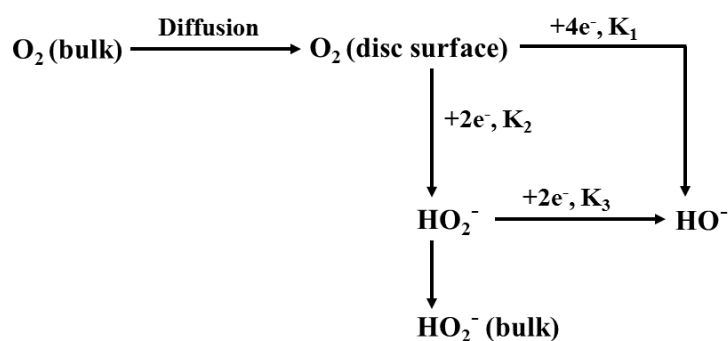

**Scheme S1.** Proposed model for electrochemical reduction of oxygen proposed by Damjanovic et al. and Hsueh et al.

Hsueh *et al.*[6] suggested a series of equations (3, 4 and 5) to calculate the rate constants  $K_1$ ,  $K_2$  and  $K_3$ , where  $I_d$ ,  $I_r$ ,  $I_{dL}$  and  $\omega$  are the disc current, ring current, limiting disc current and the rotation speed, respectively.

$$k_1 = S_1 Z_1 \frac{I_1 N - 1}{I_1 N + 1} \quad (3)$$

$$k_2 = \frac{2 S_2 Z_1}{I_1 N + 1} \quad (4)$$

$$k_3 = \frac{N S_1 Z_2}{I_1 N + 1} \quad (5)$$

Where  $S_1$  and  $I_1$  are the slope and intercept correspond to the  $I_d / I_r$  vs  $\omega^{-1/2}$  plots and  $S_2$  and is the slope of  $I_{dL} / I_{dL} - I_d$  vs  $\omega^{-1/2}$  plot.  $Z_1 = 0.62 D_{O_2}^{2/3} V^{-1/6}$ ,  $Z_2 = 0.62 D_{H_2O_2}^{2/3} V^{-1/6}$ ,  $D_{H_2O_2}$  is  $6.8 \times 10^{-6} \text{ cm}^2 \text{ s}^{-1}$  and  $N$  is the collection efficiency [7].

## References

- [1] Rana, M.; Arora, G.; Gautam, U. K. N-and S-doped high surface area carbon derived from soya chunks as scalable and efficient electrocatalysts for oxygen reduction. *Sci. Technol. Adv. Mater.* **2015**, *16*, 014803.
- [2] Tang, J.; Liu, J.; Li, C.; Li, Y.; Tade, M. O.; Dai, S.; Yamauchi, Y. Synthesis of Nitrogen-Doped Mesoporous Carbon Spheres with Extra-Large Pores through Assembly of Diblock Copolymer Micelles. *Ang. Chem. Int. Ed.* **2015**, *54*, 588–593.
- [3] Li, Y.; Li, T.; Yao, M.; Liu, S. Metal-free nitrogen-doped hollow carbon spheres synthesized by thermal treatment of poly (o-phenylenediamine) for oxygen reduction reaction in direct methanol fuel cell applications. *J. Mater. Chem.* **2012**, *22*, 10911–10917.
- [4] Zhai, Y.; Zhu, C.; Wang, E.; Dong, S. Energetic carbon-based hybrids: green and facile synthesis from soy milk and extraordinary electrocatalytic activity towards ORR. *Nanoscale* **2014**, *6*, 2964–2970.
- [5] Damjanovic, A.; Genshaw, M. A.; Bockris, J. O. Distinction between intermediates produced in main and side electrodic reactions. *J. Chem. Phys.* **1966**, *45*, 4057–4059.
- [6] Hsueh, K.L.; Chin, D.L.; Srinivasan, S. Electrode kinetics of oxygen reduction: A theoretical and experimental analysis of the rotating ring-disc electrode method. *J. Electroanal. Chem. Interfacial Electrochem.* **1983**, *153*, 79–95.
- [7] Muthukrishnan, A.; Nabae, Y.; Chang, C. W.; Okajima, T.; Ohsaka, T. A high-performance Fe and nitrogen doped catalyst derived from diazoniapentaphene salt and phenolic resin mixture for oxygen reduction reaction. *Catal. Sci. Technol.* **2015**, *5*, 1764–1774.
